# Supplementary material
Source: MDPI journal article supplement (https://www.mdpi.com/2073-4441/15/5/963)
Supplement: s1 [file s1]

Archive with 6 entries (6 files):
- FigS1.pdf
- FigS2.pdf
- FigS3.pdf
- FigS4.pdf
- S5.csv
- S6.csv
