# Supplementary material
Source: MDPI journal article supplement (https://www.mdpi.com/2073-4441/15/5/963)
Supplement: s1 [file s1 › S5.csv]

Hour	Mean	STD
0	131.62	19.2
1	127.23	9
2	128.25	9.4
3	137.21	9.4
4	188.79	10.2
5	216.03	11.3
6	242.64	12.6
7	245.35	13.6
8	213.04	14.2
9	217.24	14.6
10	237.65	15
11	202	15.2
12	212	15.6
13	200	16
14	185	16.2
15	196.49	16
16	212.93	15.6
17	237.57	14.2
18	283.49	12.6
19	290.08	11.4
20	236.54	10.4
21	190	10.1
22	185	9.8
23	155	9.5
