# Supplementary material
Source: MDPI journal article supplement (https://www.mdpi.com/2073-4441/15/5/963)
Supplement: s1 [file s1 › S6.csv]

Hour	Mean D4	STD D4	Mean D5	STD D5	Mean D6	STD D6	Mean D7	STD D7	Mean D8	STD D8
0	31	3.8	126.8	12.8	136.1	5.7	34	2.5	30.9	4.2
1	30.2	3.7	154.7	12.6	164.2	8.4	26.1	3.8	23.5	4
2	9.6	2.9	102	13.1	70.7	6.6	23.2	3.3	19.1	4.3
3	17.7	4.3	127.1	10.6	82.9	7.3	26.3	2.9	20	4.3
4	47	3.4	155.1	12.8	65.3	7.1	17.3	3.2	25.1	4.7
5	23.6	3.9	135.3	19.2	138.9	10.6	32.9	4.1	32.3	5.3
6	38.3	4.8	229.5	14.2	217.5	11.9	55.1	5.3	51.3	5.9
7	51.1	6.2	336.3	23	141.5	12.8	68.2	3.8	77.5	6.4
8	71.3	5.9	415.2	19.8	139.5	8.9	64.2	4.9	117.3	6.5
9	49.7	5.5	434.7	20.3	129.9	10.3	63.3	4.9	132.9	6.6
10	52.6	5.6	416.5	16.7	127	9.4	56.1	4	126.6	6.8
11	61.4	5.2	408.1	25.7	104.3	11.9	63.3	4.2	117.5	7
12	62.1	7.1	384.8	17.4	76.5	11	54	5.9	109.7	7.1
13	71	7.3	370.4	26.8	122.7	11.2	48.5	4.4	99.4	7.4
14	42.9	6.2	339.5	20.3	104	13.9	51.5	6.2	89	7.5
15	41.7	6.1	311.3	20.1	156.7	15	54.2	5	80.3	7.3
16	42.4	6.6	312.2	23.8	141.4	11	61.5	4.3	86.8	7.1
17	86.5	6.6	330	24.1	78.2	12.2	64.4	4	83.5	6.5
18	55.8	5.9	356.4	18	121.1	9.9	62.1	4	95.7	5.8
19	63.2	4.8	412.2	16.2	110.5	7.1	70.4	3.7	106.2	5.2
20	54.8	3.2	382.7	16.1	101.6	7.3	67.1	4.4	100.8	4.8
21	50	4.5	329.3	11.5	112.8	8.7	53.4	4.2	90.3	4.4
22	26.5	4.1	245.7	16.6	137.2	6.9	34.8	3.8	69	3.8
23	42.8	4.3	196.9	10.7	49.8	8.2	32.3	3.6	45.3	3.2
