# Supplementary material
Source: MDPI journal article supplement (https://www.mdpi.com/2073-4441/15/5/963)

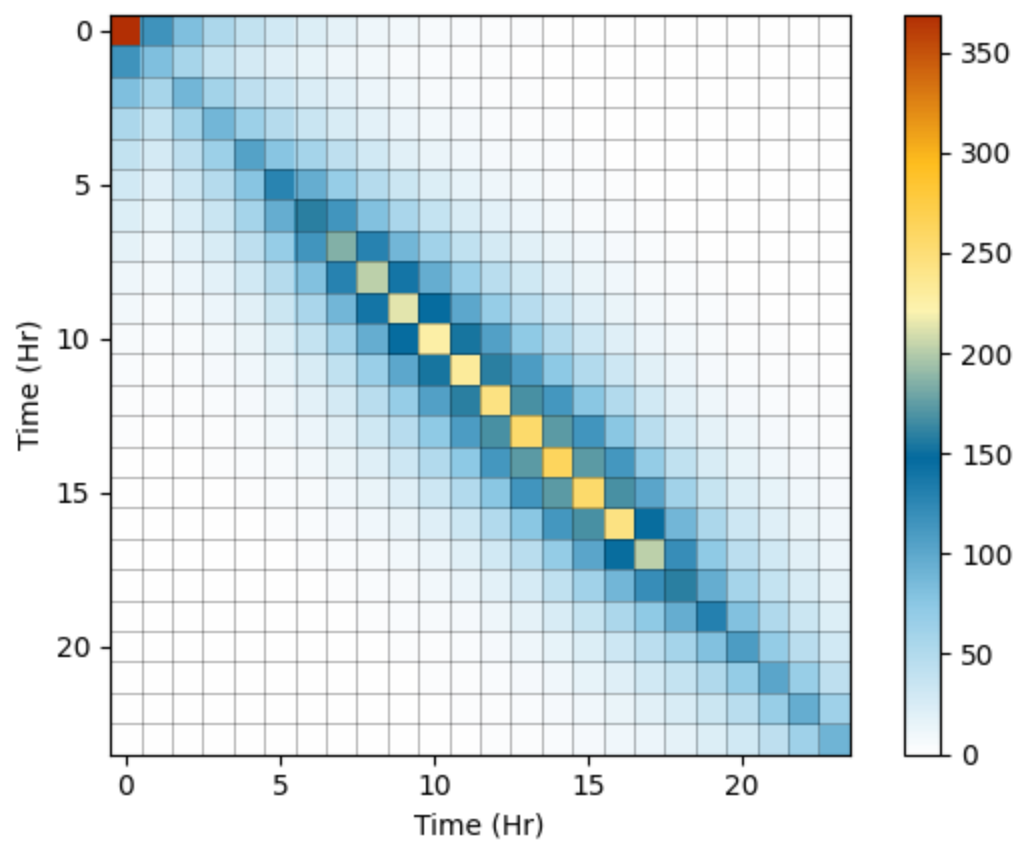

**Figure S1** – Illustrative network consumer demand covariance matrix

Supplement: s1 [file s1]

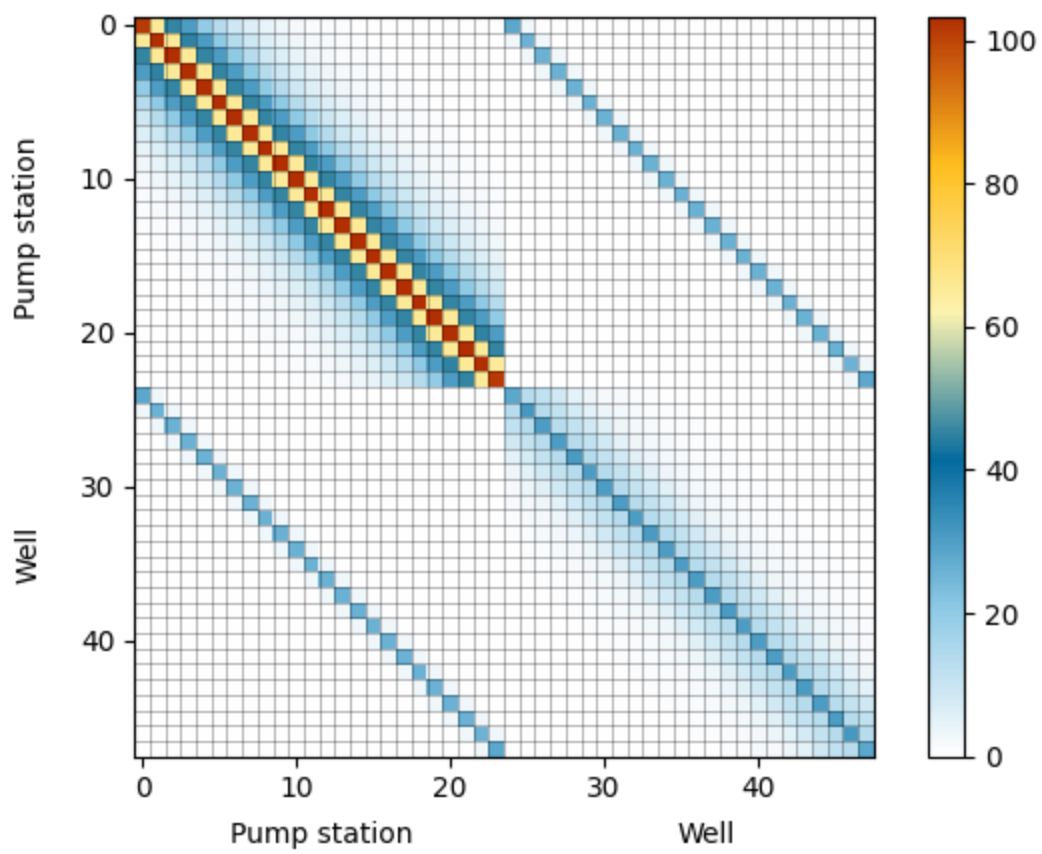

**Figure S2** – Illustrative network operational costs covariance matrix

Supplement: s1 [file s1]

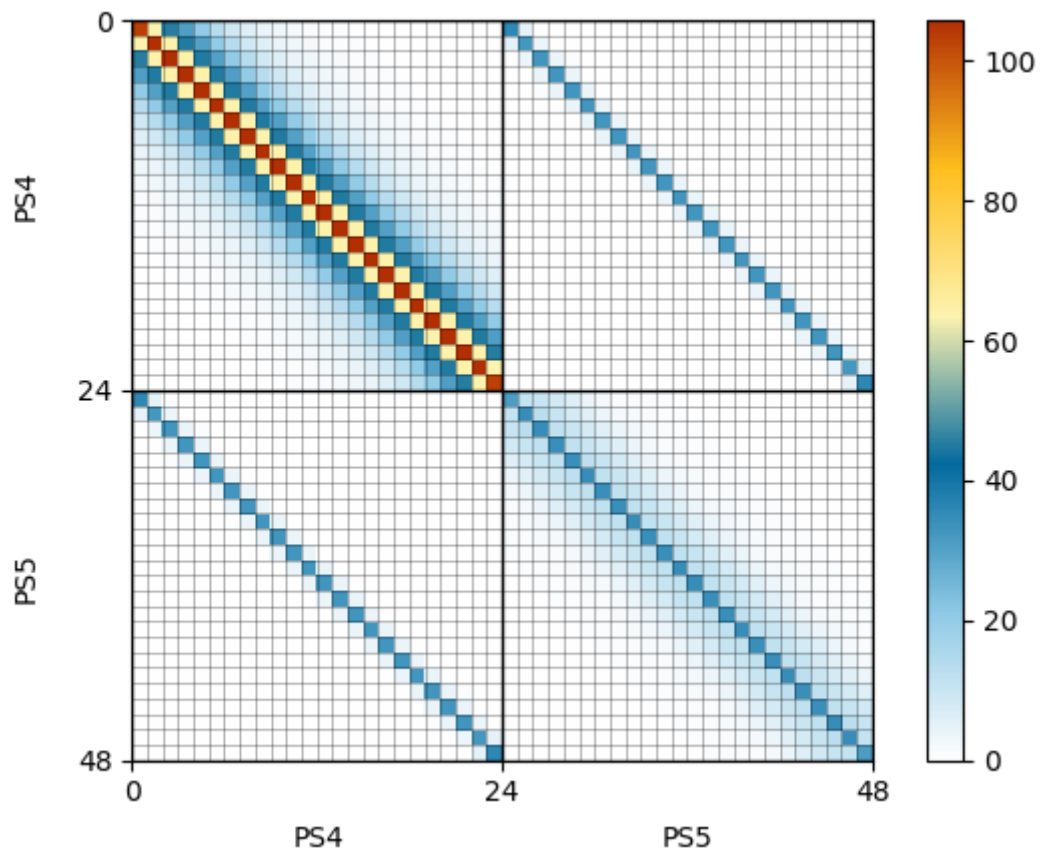

**Figure S4** – Sopron network operational costs covariance matrix

Supplement: s1 [file s1]

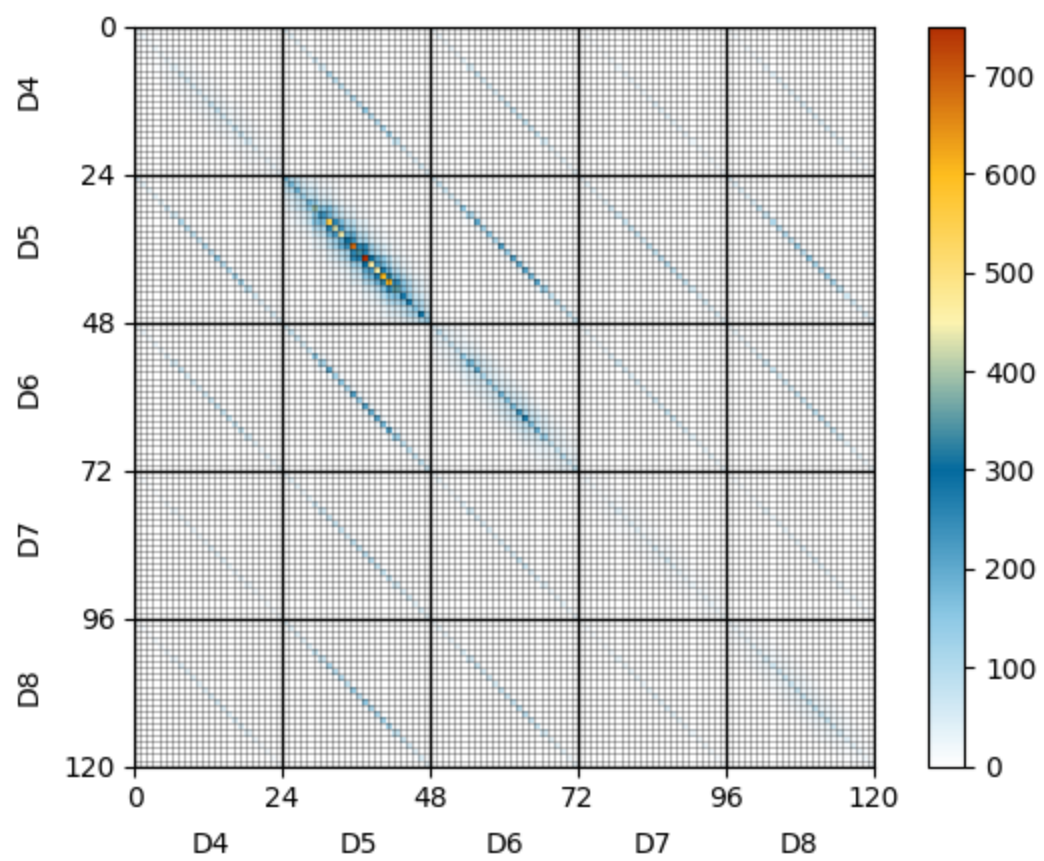

**Figure S3** – Sopron network demand covariance matrix

Supplement: s1 [file s1]
